# Supplementary material for: An electrochemically driven poly(dimethylsiloxane) microfluidic actuator: oxygen sensing and programmable flows and pH gradients
Source: Royal Society of Chemistry journal article supplement (doi:10.1039/b416671j), 2005-01-01
Supplement: b416671j.pdf [file b416671j.pdf]

## Supplementary Material

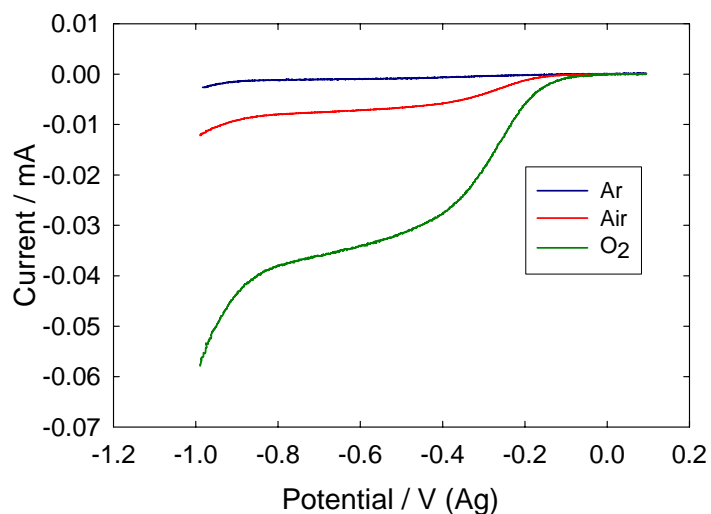

Figure 1. Polarization curves recorded in argon, air and oxygen atmosphere in 0.1 M KCl + 0.1 mM fluorescein (pH = 4) at 1 mV/s.

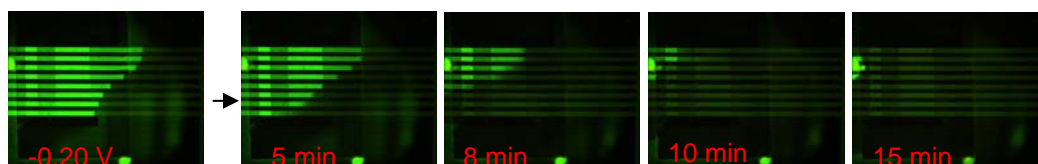

Figure 2. Fluorescence micrographs recorded after the cell has been shut-off. The device had been subjected to a potential scan from OCP to -0.6 V and back to -0.2 V at scan rate of 1 mV/s. The micrographs shown were taken at various times (denoted in the legends of the images) after device shut-off. Exposure time: 400 ms.
